# Supplementary material for: Molecular structure and gas-phase reactivity of clonidine and rilmenidine: Two-layered ONIOM calculations
Source: Royal Society of Chemistry journal article supplement (doi:10.1039/b009660l), 2001-01-01
Supplement: table.doc [file table.doc]

**Table A ONIOM Energies, enthalpies and Gibbs energies (hartrees / molecule) of clonidine, and rilmenidine species studied**

| Species | Energy + ZPEa | Enthalpyb | Gibbs energyb |
| --- | --- | --- | --- |
|  | Clonidine | | |
| **CI** | -282.657 726 | -282.644 318 | -282.698 910 |
| **CIA** | -282.659 061 | -282.645 646 | -282.700 097 |
| **CII** | -282.669 531 | -282.656 211 | -282.710 248 |
| **CIII** | -282.087 687 | -282.074 576 | -282.128 210 |
| **CIV** | -282.124 265 | -282.111 145 | -282.164 838 |
| **CV** | -282.124 736 | -282.111 659 | -282.165 109 |
| **CVI** | -282.975 206 | -282.961 760 | -283.016 327 |
| **CVII** | -283.047 217 | -283.033 418 | -283.088 437 |
| **CVIII** | -282.995 354 | -282.981 789 | -283.036 669 |
| **CIX** | -283.047 217 | -283.033 418 | -283.088 437 |
| **CX** | -283.004 092 | -282.990 494 | -283.045 540 |
|  | Rilmenidine | | |
| **RI** | -302.411 846 | -302.398 222 | -302.452 850 |
| **RIA** | -302.409 076 | -302.359 589 | -302.450 052 |
| **RII** | -302.410 537 | -302.397 237 | -302.450 939 |
| **RIIA** | -302.404 886 | -302.391 534 | -302.445 318 |
| **RIII** | -301.845 606 | -301.832 451 | -301.885 960 |
| **RIV** | -301.841 115 | -301.827 892 | -301.881 542 |
| **RV** | -302.734 082 | -302.720 506 | -302.775 295 |
| **RVI** | -302.742 956 | -302.727 608 | -302.787 690 |
| **RVII** | -302.789 437 | -302.775 777 | -302.830 076 |
| **RVIII** | -302.787 584 | -302.773 862 | -302.828 265 |
| **RIX** | -302.789 438 | -302.775 777 | -302.830 079 |
| **RX** | -302.741 405 | -302.727 797 | -302.782 536 |

a At T=0 K; b At T=298.15 K;
